# Supplementary material
Source: PubMed Central journal article supplement (PMC8608683)

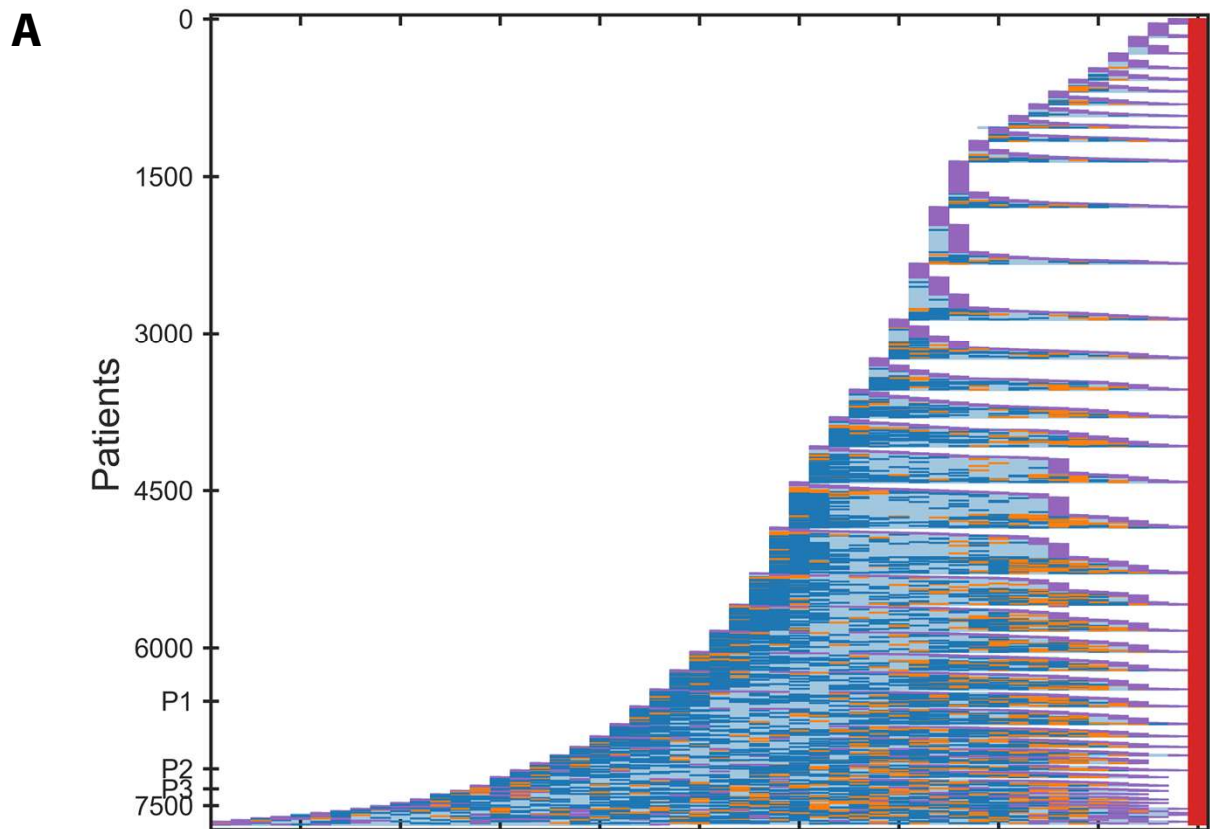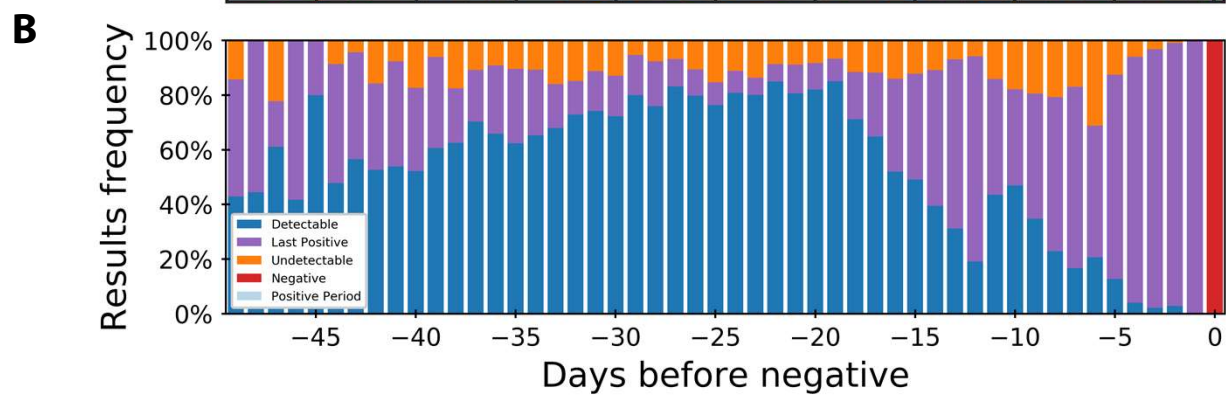

Supplement: mmc1.pdf [file mmc1.pdf]

**A**

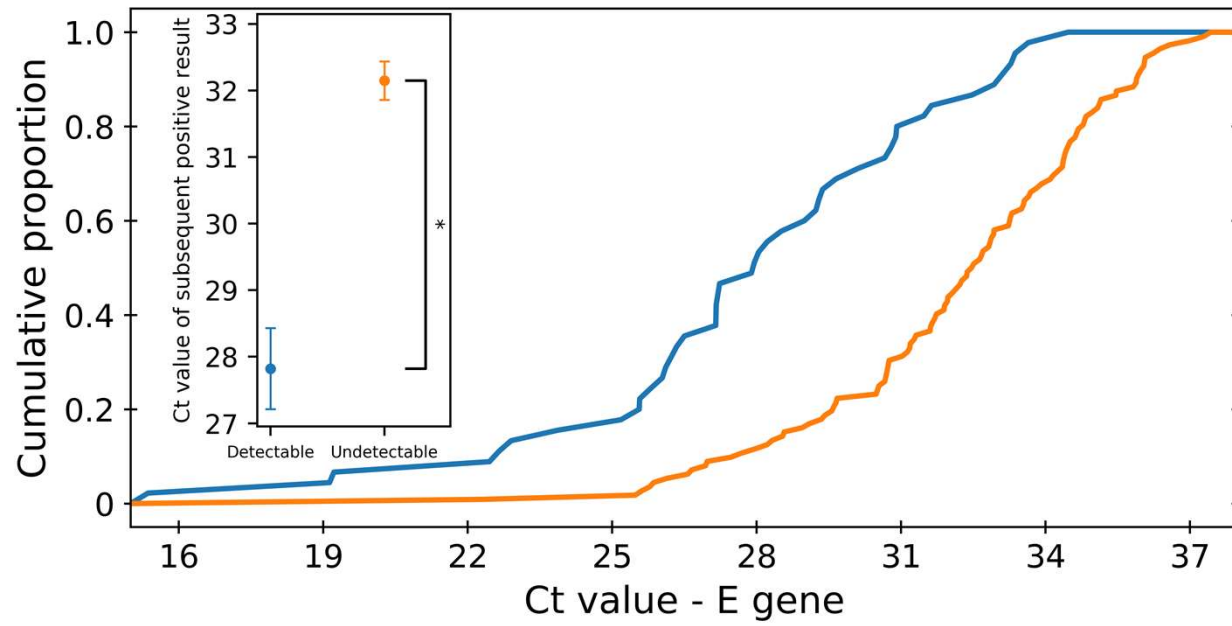

**B**

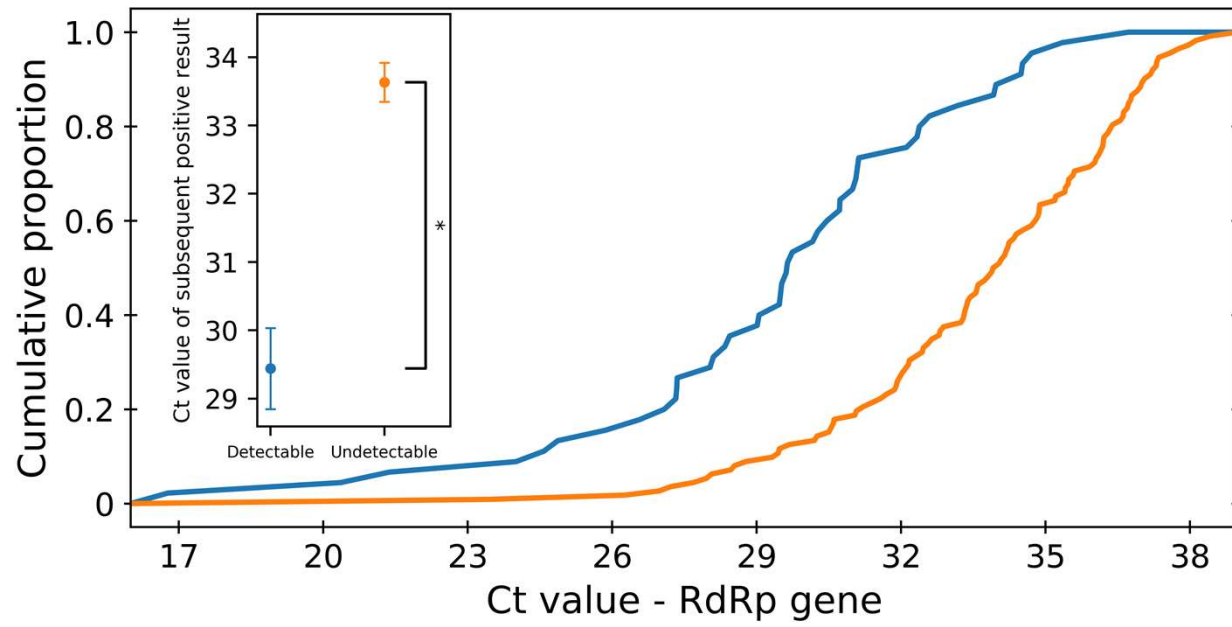

**C**

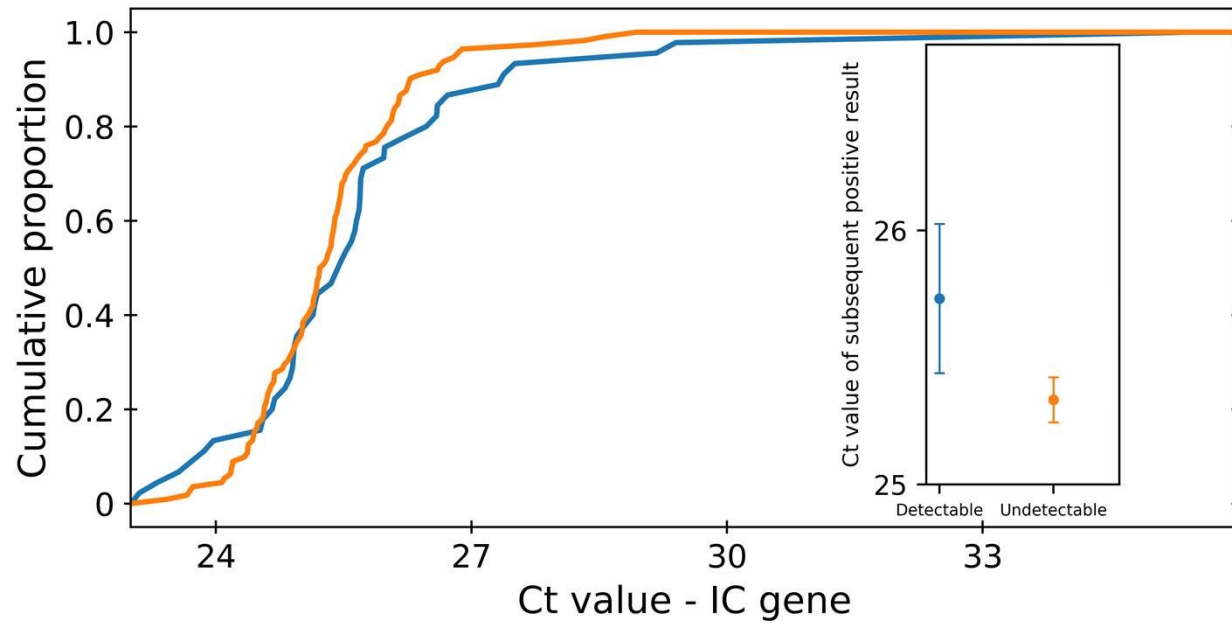

Supplement: mmc3.pdf [file mmc3.pdf]
